# Supplementary material for: Recognition and reporting of suspected adverse drug reactions by surveyed healthcare professionals in Uganda: key determinants
Source: HighWire-hosted journal article supplement (doi:10.1136/bmjopen-2014-005869), 2014-11-01
Supplement: bmjopen-2014-005869supp.pdf [file bmjopen-2014-005869supp.pdf]

|                                                                                                                                                                                                                                                                                                                                                                                                                                                                |                                                                                                                                                                                                                                                                 |
|----------------------------------------------------------------------------------------------------------------------------------------------------------------------------------------------------------------------------------------------------------------------------------------------------------------------------------------------------------------------------------------------------------------------------------------------------------------|-----------------------------------------------------------------------------------------------------------------------------------------------------------------------------------------------------------------------------------------------------------------|
| <p><b>13. Are you actively involved in medical research?</b></p> <p>[1] Yes [2] No</p>                                                                                                                                                                                                                                                                                                                                                                         | <p><b>14. Professional Cadre (Tick one only)</b></p> <p>[1] Doctor (go to 15)</p> <p>[2] Pharmacist (go to 22)</p> <p>[3] Nurse (go to 19)</p> <p>[4] Clinical officer (go to 23)</p> <p>[5] Pharmacy Technician (go to 22)</p> <p>[6] Other (Specify).....</p> |
| <p><b>15. Position/Level of Doctor (Tick one only)</b></p> <p>[1] Senior Consultant</p> <p>[2] Consultant</p> <p>[3] Medical Officer Special Grade</p> <p>[4] Medical Officer</p> <p>[5] Senior House Officer</p> <p>[6] Intern Doctor</p> <p>[7] Other (specify).....</p>                                                                                                                                                                                     | <p><b>16. For how long have you been prescribing?</b></p> <p>..... Months (If less than 1 year)</p> <p>..... Completed Years</p>                                                                                                                                |
| <p><b>17. What is the approximate number of prescriptions you write per day?.....</b></p>                                                                                                                                                                                                                                                                                                                                                                      | <p><b>18. Have you given verbal prescriptions/orders to the attending nurse in the past 12 months?</b></p> <p>[1] Yes [2] No</p> <p style="text-align: right;"><i>(Skip to 23)</i></p>                                                                          |
| <p><b>19. Which of the following cadre category describes your qualification? (Tick one only)</b></p> <p>[1] Enrolled Midwife</p> <p>[2] Enrolled Nurse</p> <p>[3] Enrolled Mental Health Nurse</p> <p>[4] Enrolled Comprehensive Nurse</p> <p>[5] Registered Midwife</p> <p>[6] Registered Nurse</p> <p>[7] Registered Nurse/Midwife</p> <p>[8] Registered Mental Health Nurse</p> <p>[9] Registered Comprehensive Nurse</p> <p>[10] Other (specify).....</p> | <p><b>20. In some health facilities, nurses usually write out (transcribe) drug prescriptions from patients' medical records to medication charts. Are you required to transcribe prescriptions in your health facility?</b></p> <p>[1] Yes [2] No</p>          |
| <p><b>21. In practice, do you regularly transcribe prescriptions?</b></p> <p>[1] Yes [2] No</p> <p style="text-align: right;"><i>(Skip to 23)</i></p>                                                                                                                                                                                                                                                                                                          | <p><b>22. If pharmacist or pharmacy technician, area of practice (Tick all that apply)</b></p> <p>[1] Hospital [3] Academia</p> <p>[2] Industry [4] Community/Private</p>                                                                                       |
| <p><b>SUSPECTED ADVERSE DRUG REACTION (ADR) REPORTING PROGRAM</b></p>                                                                                                                                                                                                                                                                                                                                                                                          |                                                                                                                                                                                                                                                                 |

|                                                                                                                                                                                                                                                                                                                                                  |                                                                                                                                          |            |            |         |         |                                                                                                                                                                                                                                                                                                                                                                                                                      |
|--------------------------------------------------------------------------------------------------------------------------------------------------------------------------------------------------------------------------------------------------------------------------------------------------------------------------------------------------|------------------------------------------------------------------------------------------------------------------------------------------|------------|------------|---------|---------|----------------------------------------------------------------------------------------------------------------------------------------------------------------------------------------------------------------------------------------------------------------------------------------------------------------------------------------------------------------------------------------------------------------------|
| <p><b>23. Have you received any complaint of adverse drug reactions (ADRs) from patients in the last 4 weeks?</b></p> <p>[1] Yes    [2] No (If no, go to 25)</p>                                                                                                                                                                                 | <p><b>24. If yes, how many complaints of ADRs have you received in the last 4 weeks? .....</b></p>                                       |            |            |         |         |                                                                                                                                                                                                                                                                                                                                                                                                                      |
| <p><b>25. Have you suspected an ADR in the last 4 weeks?</b></p> <p>[1] Yes    [2] No (If no, go to 28)</p>                                                                                                                                                                                                                                      | <p><b>26. If yes, how many ADRs have you suspected in the last 4 weeks? .....</b></p>                                                    |            |            |         |         |                                                                                                                                                                                                                                                                                                                                                                                                                      |
| <p><b>27. Briefly describe the most recent suspected ADR you encountered providing information on patient age, drug involved &amp; route of administration, outcome of ADR &amp; its severity (mild, moderate, severe); e.t.c.</b></p> <p>.....</p> <p>.....</p> <p>.....</p> <p>.....</p>                                                       |                                                                                                                                          |            |            |         |         |                                                                                                                                                                                                                                                                                                                                                                                                                      |
| <p><b>28. Have you ever encountered a fatal ADR that might have led to a patient's death?</b></p> <p>[1] Yes    [2] No</p>                                                                                                                                                                                                                       | <p><b>29. Have you reported any suspected ADR in the last 12 months?</b></p> <p>[1] Yes    [2] No (If No, go to 35)</p>                  |            |            |         |         |                                                                                                                                                                                                                                                                                                                                                                                                                      |
| <p><b>30. If yes, please indicate the period within which you reported the most recent suspected ADR</b></p> <p>[1]            [2]            [3]            [4]            [5]</p> <table border="1" data-bbox="203 993 771 1062"> <tr> <td>4 weeks</td> <td>5-8 weeks</td> <td>9-12 weeks</td> <td>4-6 mo</td> <td>7-12 mo</td> </tr> </table> | 4 weeks                                                                                                                                  | 5-8 weeks  | 9-12 weeks | 4-6 mo  | 7-12 mo | <p><b>31. To which authorities did you report the most recent of these ADRs?</b><br/><i>(Tick all that apply)</i></p> <p>[1] National Drug Authority (NDA)</p> <p>[2] AIDS Treatment Information Centre (ATIC)</p> <p>[3] Drug Manufacturer</p> <p>[4] Medical Superintendent</p> <p>[5] District Director of Health Services (DDHS)</p> <p>[6] Institutional Review Board (IRB)</p> <p>[7] Other (specify).....</p> |
| 4 weeks                                                                                                                                                                                                                                                                                                                                          | 5-8 weeks                                                                                                                                | 9-12 weeks | 4-6 mo     | 7-12 mo |         |                                                                                                                                                                                                                                                                                                                                                                                                                      |
| <p><b>32. What motivated you to report the suspected ADR?</b></p> <p>.....</p> <p>.....</p> <p>.....</p>                                                                                                                                                                                                                                         | <p><b>33. Did you get any feedback about the ADR report(s) you submitted?</b></p> <p>[1] Yes    [2] No</p>                               |            |            |         |         |                                                                                                                                                                                                                                                                                                                                                                                                                      |
| <p><b>34. Have you reported an ADR to the National Drug Authority in the past 12 months?</b></p> <p>[1] Yes    [2] No</p>                                                                                                                                                                                                                        | <p><b>35. Have you wanted to report an ADR in the past 12 months but did not have the ADR report form?</b></p> <p>[1] Yes    [2] No</p>  |            |            |         |         |                                                                                                                                                                                                                                                                                                                                                                                                                      |
| <p><b>36. Have you had an ADR suspicion in the past 12 months but did not fill the ADR report form even when you had it?</b></p> <p>[1] Yes    [2] No</p>                                                                                                                                                                                        | <p><b>37. Did you ever fill the ADR report form but failed to send it for any reason?</b></p> <p>[1] Yes    [2] No (If no, go to 39)</p> |            |            |         |         |                                                                                                                                                                                                                                                                                                                                                                                                                      |

|                                                                                                                                                                                                                                                                                  |                                                                                                                                                                                                                                                                                                                                 |
|----------------------------------------------------------------------------------------------------------------------------------------------------------------------------------------------------------------------------------------------------------------------------------|---------------------------------------------------------------------------------------------------------------------------------------------------------------------------------------------------------------------------------------------------------------------------------------------------------------------------------|
| <p><b>38. If yes, what was the reason(s) that you did not send the form on the most recent occasion?</b></p> <p>.....</p> <p>.....</p> <p>.....</p>                                                                                                                              | <p><b>39. Which of the following health workers are qualified to report adverse drug reactions?</b></p> <p>(Tick all that apply)</p> <p>[1] Medical doctors      [4] Pharmacists</p> <p>[2] Dentists              [5] Clinical Officers</p> <p>[3] Nurses</p>                                                                   |
| <p><b>40. Pharmacovigilance relates to a reporting system for adverse effects of medicines. Have you ever heard about Pharmacovigilance?</b></p> <p>[1] Yes      [2] No (If no, go to 42)</p>                                                                                    | <p><b>41. If yes, please state the source(s) of your information</b> (Tick all that apply)</p> <p>[1] Books/Journals</p> <p>[2] Internet/e-communication</p> <p>[3] Trainings/Seminars/courses attended</p> <p>[4] Television</p> <p>[5] Outdoor adverts</p> <p>[6] Professional colleague</p> <p>[7] Others (Specify).....</p> |
| <p><b>42. Are you aware of the existence of a National Pharmacovigilance Centre (NPC) in Uganda?</b></p> <p>[1] Yes      [2] No (If no, go to 44)</p>                                                                                                                            | <p><b>43. If yes, do you know where the NPC office is located?</b></p> <p>[1] Yes      [2] No</p>                                                                                                                                                                                                                               |
| <p><b>44. Have you ever seen the ADR form used for reporting ADRs to the NPC?</b></p> <p>[1] Yes      [2] No (If no, go to 48)</p>                                                                                                                                               | <p><b>45. If yes, have you ever filled out the NPC ADR form?</b></p> <p>[1] Yes      [2] No (If no, go to 47)</p>                                                                                                                                                                                                               |
| <p><b>46. Was the information on the NPC ADR form clear to you about what to report?</b></p> <p>[1] Yes      [2] No</p>                                                                                                                                                          | <p><b>47. Have you ever filled out any ADR form different from that of the NPC?</b></p> <p>[1] Yes      [2] No</p>                                                                                                                                                                                                              |
| <p><b>48. Have you ever submitted an ADR report to the NPC?</b></p> <p>[1] Yes      [2] No</p>                                                                                                                                                                                   | <p><b>49. Do you know where to obtain the NPC ADR forms in this health facility?</b></p> <p>[1] Yes      [2] No</p>                                                                                                                                                                                                             |
| <p><b>50. Do you know to whom to report ADRs in your health facility?</b></p> <p>[1] Yes      [2] No (If no, go to 52)</p>                                                                                                                                                       | <p><b>51. If yes, please specify in your health facility to whom you would report an ADR if you had to?</b></p> <p>.....</p> <p>.....</p>                                                                                                                                                                                       |
| <p><b>52. An ADR reporting system should;</b><br/>(Tick all that apply)</p> <p>[1] be compulsory</p> <p>[2] be voluntary</p> <p>[3] provide financial incentives to the reporter</p> <p>[4] hide the identity of the prescriber</p> <p>[5] hide the identity of the reporter</p> | <p><b>53. Have you ever been trained on how to report ADRs with the ADR form?</b></p> <p>[1] Yes      [2] No</p>                                                                                                                                                                                                                |

|                                                                    |  |
|--------------------------------------------------------------------|--|
| [6] hide the identity of the patient                               |  |
| <b>54. Please suggest possible ways of improving ADR reporting</b> |  |
| .....                                                              |  |
| .....                                                              |  |

**Instructions**

In the left column are questions that will be the subject of your evaluation and in the right column is a gradual scale where you should mark with **X** the place along the scale where, according to your opinion, represents your degree of agreement with the text comment. The **extreme left** side indicates **total disagreement** while the **extreme right** indicates **total agreement**. Agreement increases as you move across from left to right

Please indicate whether you agree or disagree with the following statements

(1 = Strongly disagree; 2 = Slightly disagree; 3 = Neutral; 4 = Slightly agree; 5 = Strongly agree)

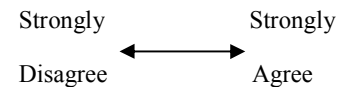

|    | Statement                                                                                                                | 1 | 2 | 3 | 4 | 5 |
|----|--------------------------------------------------------------------------------------------------------------------------|---|---|---|---|---|
| 55 | Serious ADRs are well documented by the time a drug is marketed                                                          |   |   |   |   |   |
| 56 | It is nearly impossible to determine whether a drug is responsible for a particular adverse reaction                     |   |   |   |   |   |
| 57 | I would only report an ADR if I was sure that it was related to the use of a particular drug                             |   |   |   |   |   |
| 58 | The one case of an ADR that an individual health worker might see makes no significant contribution to medical knowledge |   |   |   |   |   |
| 59 | I read articles about adverse drug reactions with interest                                                               |   |   |   |   |   |
| 60 | I have a professional obligation to report ADRs                                                                          |   |   |   |   |   |
| 61 | Reporting ADRs puts my career at risk                                                                                    |   |   |   |   |   |
| 62 | It is only necessary to report serious or unexpected ADRs                                                                |   |   |   |   |   |
| 63 | I do not have time to complete an ADR report form                                                                        |   |   |   |   |   |
| 64 | I do not have the time to actively look for ADRs while at work                                                           |   |   |   |   |   |
| 65 | I do not know how information reported in ADR form is used                                                               |   |   |   |   |   |
| 66 | I talk with pharmaceutical companies about possible ADRs with their drugs                                                |   |   |   |   |   |
| 67 | I think that the best way to report ADRs is by publishing in medical literature                                          |   |   |   |   |   |
| 68 | I should be financially reimbursed for providing the ADR service                                                         |   |   |   |   |   |
| 69 | I would be more likely to report ADRs if there were an easier method                                                     |   |   |   |   |   |
